# Supplementary material for: Targeting Pin1 Protects Mouse Cardiomyocytes from High‐Dose Alcohol‐Induced Apoptosis
Source: Hindawi journal article supplement (doi:10.1155/2016/4528906), 2015-12-01

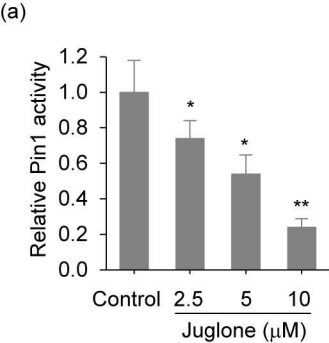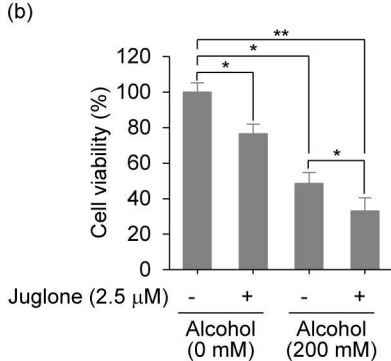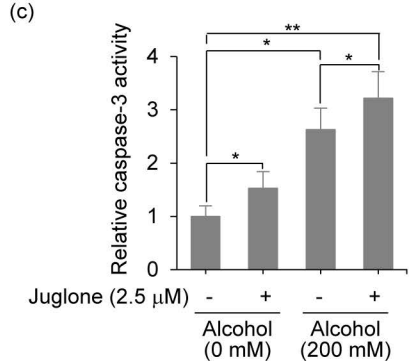

Supplement: f1 [file 4528906.f1.pdf]
